# Supplementary material for: Preparation of macroporous scaffolds with holes in pore walls and pressure driven flows through them
Source: Royal Society of Chemistry journal article supplement (doi:10.1039/c8ra03867h), 2018-01-01
Supplement: c8ra03867h1.pdf [file c8ra03867h1.pdf]

## Preparation of macroporous scaffolds with holes in pore walls and pressure driven flows through them

Soumyajyoti Chatterjee<sup>#1</sup>, Aditi Potdar<sup>#2</sup>, Simon Kuhn<sup>2\*</sup> and Guruswamy Kumaraswamy<sup>1\*</sup>

<sup>1</sup> J-101, Polymers and Advanced Materials Laboratory, Complex Fluids and Polymer Engineering, Polymer Science and Engineering Division, CSIR-National Chemical Laboratory, Pune-411008, Maharashtra, India.

<sup>2</sup> KU Leuven, Department of Chemical Engineering, Celestijnenlaan 200F, 3001 Leuven, Belgium.

<sup>#</sup> Equal contribution

<sup>\*</sup> Corresponding authors: [simon.kuhn@kuleuven.be](mailto:simon.kuhn@kuleuven.be) and [g.kumaraswamy@ncl.res.in](mailto:g.kumaraswamy@ncl.res.in)

**Table S1:** Predicted Peclet number of each compartment obtained by fitting the experimental data with the two PFRs in parallel model.

| Scaffolds        | Flow rate<br>(ml/min) | <b>Pe<sub>1</sub></b> |            |          | <b>Pe<sub>2</sub></b> |            |          |
|------------------|-----------------------|-----------------------|------------|----------|-----------------------|------------|----------|
|                  |                       | <b>0.25</b>           | <b>0.5</b> | <b>1</b> | <b>0.25</b>           | <b>0.5</b> | <b>1</b> |
| S <sub>0</sub>   |                       | 23.8                  | 14.2       | 27.6     | 447.9                 | 336.4      | 132.5    |
| S <sub>1.6</sub> |                       | 32.9                  | 16.7       | 29.0     | 313.3                 | 203.0      | 116.2    |
| S <sub>3.2</sub> |                       | 31.8                  | 8.4        | 16.1     | 442.0                 | 890.4      | 197.4    |
| S <sub>6.4</sub> |                       | 61.5                  | 9.4        | 10.2     | 282.9                 | 508.8      | 241.9    |

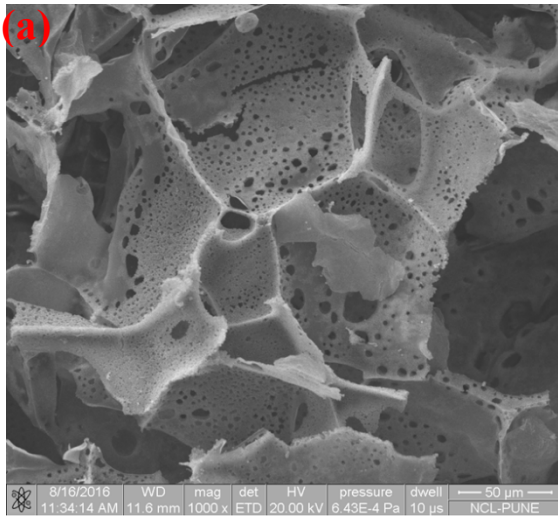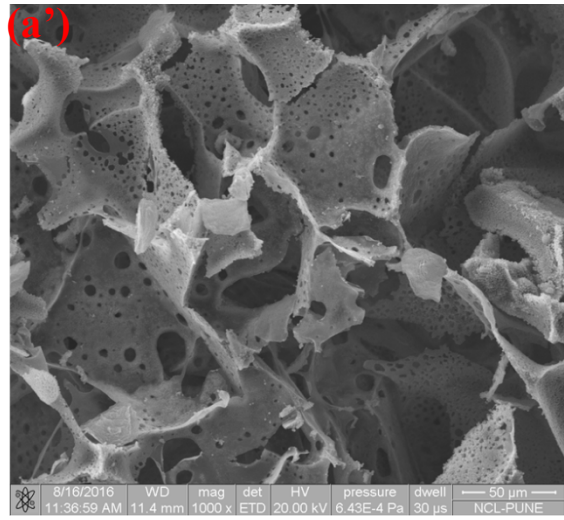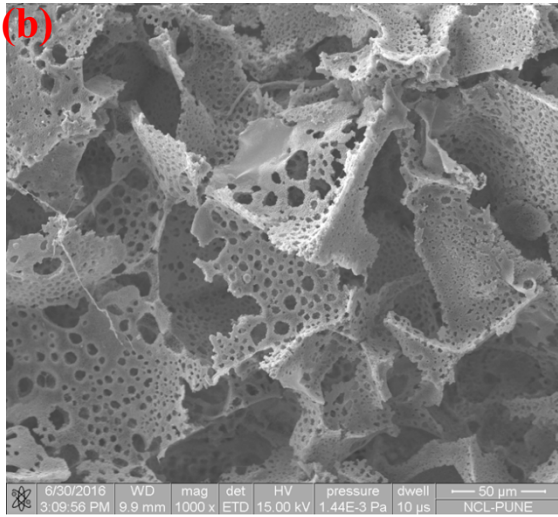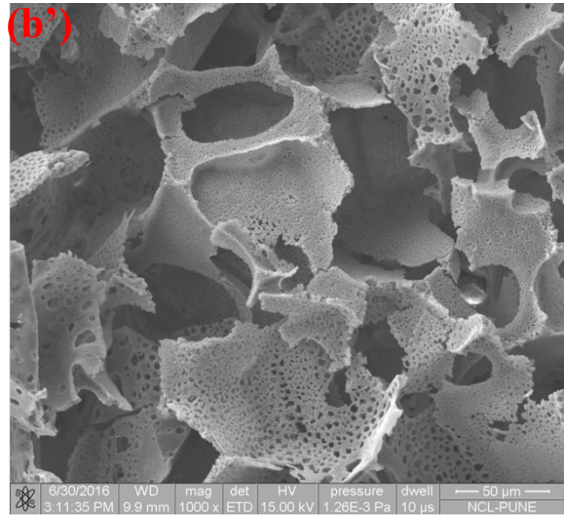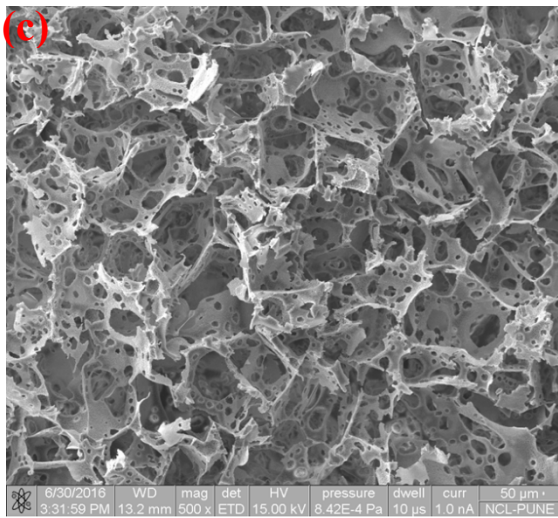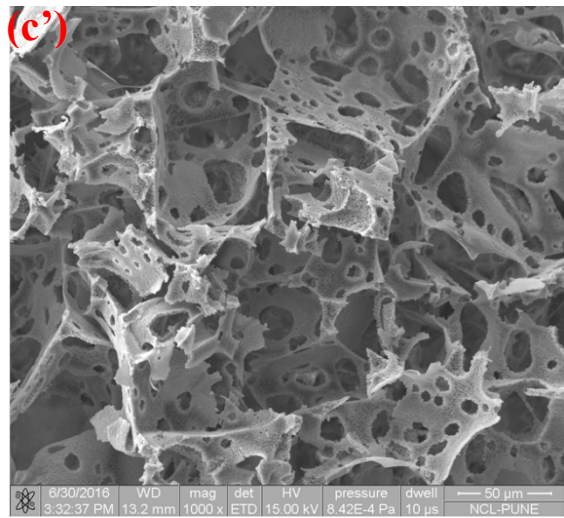

**Fig. S1:** SEM images of S<sub>1.6</sub> (a, a'); S<sub>3.2</sub> (b, b'); and S<sub>6.4</sub> (c, c')

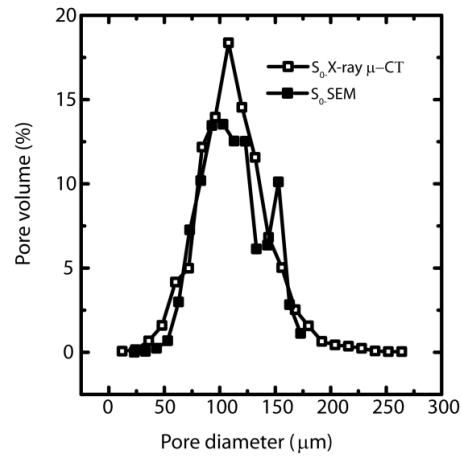

**Fig. S2:** Comparison of X-ray  $\mu$ -CT result and SEM analysis of  $S_0$ . We obtain the distribution of pore volume directly from the software that is supplied with the X-ray  $\mu$ -CT instrument. We obtain the number fraction of pores from SEM and convert it to a pore volume distribution by scaling the number fraction using  $d^3$ , where  $d$  is the pore diameter.

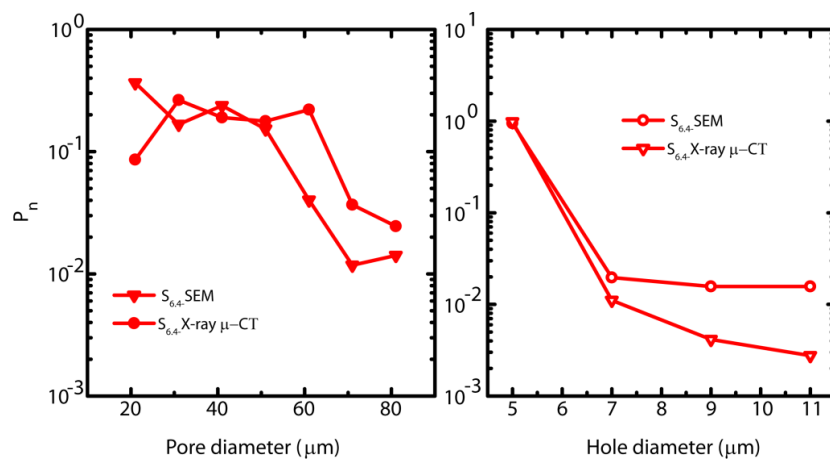

**Fig. S3:** Comparison of X-ray  $\mu$ -CT result and SEM analysis of  $S_{6.4}$ .  $P_n$  represents the distribution of pore sizes based on number fraction.

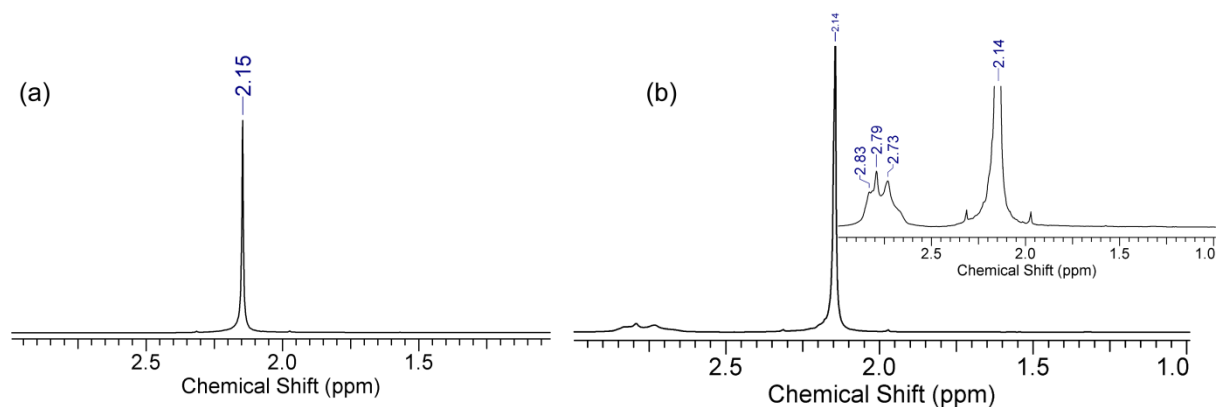

**Fig. S4:** Room temperature <sup>1</sup>H NMR spectra of (a) Water/6.4 % ACN and (b) Water/6.4 % ACN/1% PEI mixtures. In (a) a sharp peak at  $\delta=2.15$  ppm corresponds to methyl protons of ACN can be seen. In (b) a similar sharp peak at  $\delta=2.14$  ppm of the methyl proton is observed. Inset is a magnified version of (b) demonstrating the peaks corresponding to PEI at  $\delta=2.83$ ; 2.79; and 2.73 ppm.

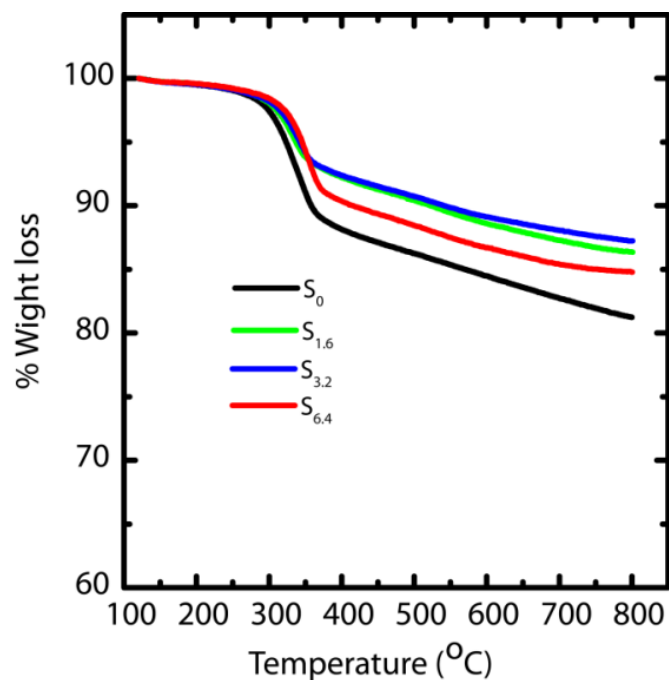

**Fig. S5:** TGA of the scaffolds under N<sub>2</sub> atmosphere.

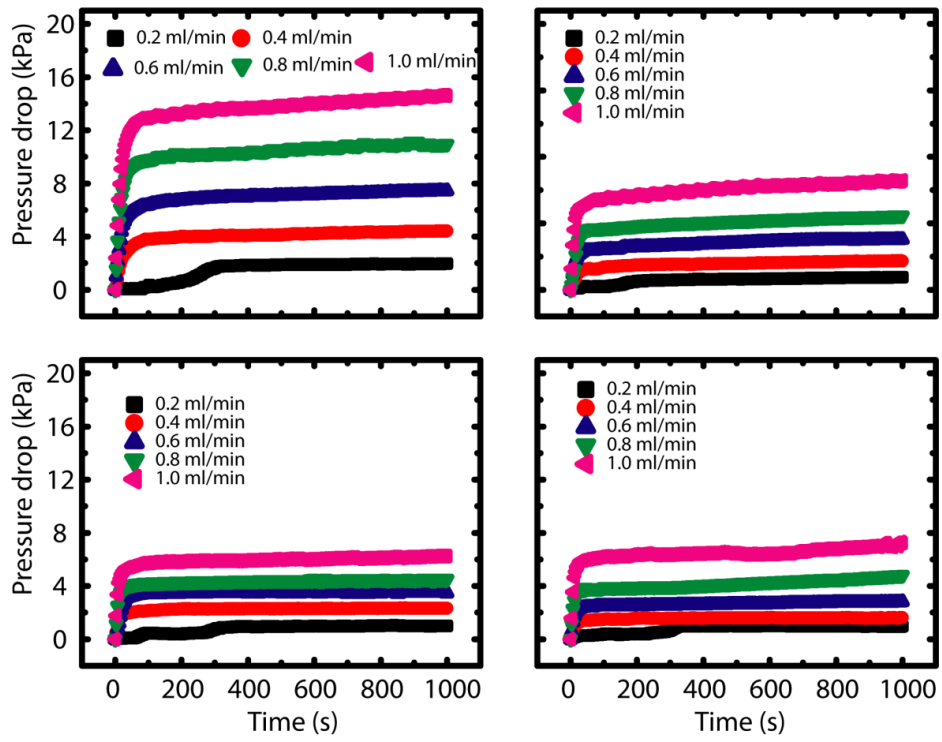

**Fig. S6:** Pressure drop measurement at different flow rates with time.
